# Supplementary material for: P2Y2 receptor promotes cell invasion and metastasis in prostate cancer cells
Source: PubMed Central journal article supplement — Br J Cancer. 2013 Aug 22;109(6):1666–75. doi: 10.1038/bjc.2013.484 (PMC3776994; doi:10.1038/bjc.2013.484), 2013-08-22
Supplement: bjc2013484x1.pdf [file bjc2013484x1.pdf]

# Supplementary Figure 1

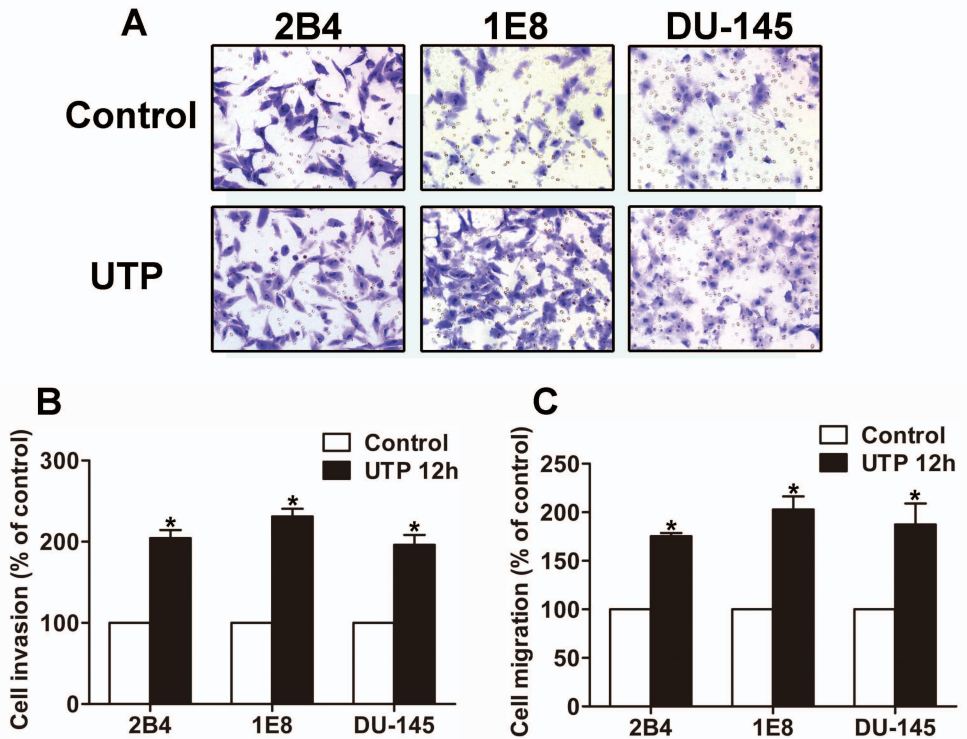

**Supplementary Figure 1.** *In vitro* invasion and migration assay of cells after UTP treatment. (A) Cells were stained with crystal violet and observed under the microscope at  $\times 200$  magnification. (B) Effect of UTP treatment on *in vitro* invasion of 2B4, 1E8 and DU-145 cells. (C) Effect of UTP treatment on *in vitro* migration of 2B4, 1E8 and DU-145 cells. \* $P < 0.05$ .
