# Supplementary material for: P2Y2 receptor promotes cell invasion and metastasis in prostate cancer cells
Source: PubMed Central journal article supplement — Br J Cancer. 2013 Aug 22;109(6):1666–75. doi: 10.1038/bjc.2013.484 (PMC3776994; doi:10.1038/bjc.2013.484), 2013-08-22
Supplement: bjc2013484x2.pdf [file bjc2013484x2.pdf]

## Supplementary Figure 2

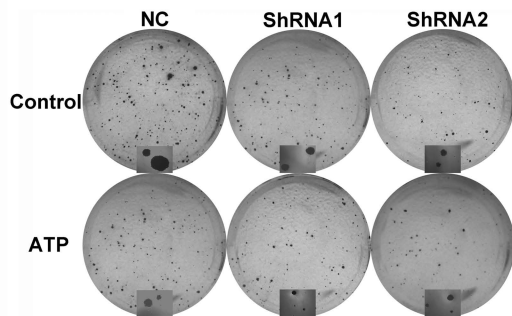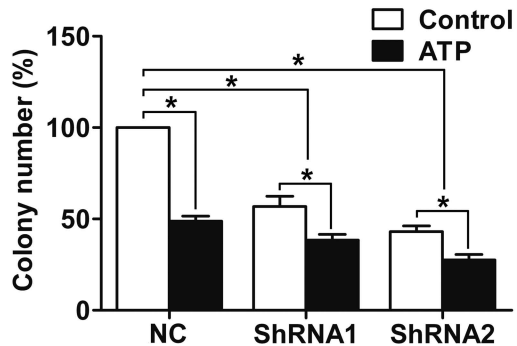

**Supplementary Figure 2.** Colonies formed in soft agar assay.  $1E8$  stable cells were treated with or without ATP, and vital colonies were observed after 14 days. \* $P < 0.05$ .
