# Supplementary material for: P2Y2 receptor promotes cell invasion and metastasis in prostate cancer cells
Source: PubMed Central journal article supplement — Br J Cancer. 2013 Aug 22;109(6):1666–75. doi: 10.1038/bjc.2013.484 (PMC3776994; doi:10.1038/bjc.2013.484), 2013-08-22
Supplement: bjc2013484x3.pdf [file bjc2013484x3.pdf]

## Supplementary Figure 3

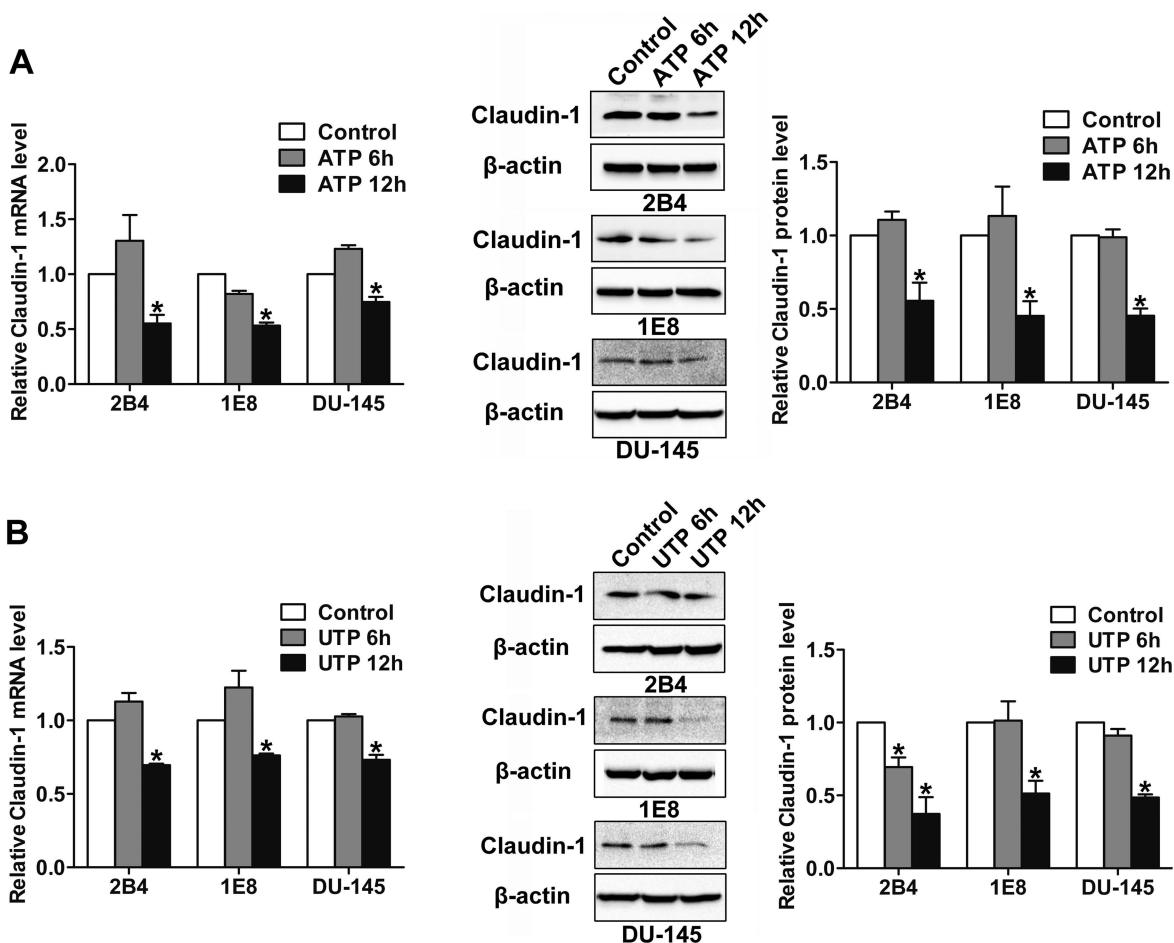

**Supplementary Figure 3.** Extracellular ATP and UTP inhibited the expression of Claudin-1. (A) Expression of Claudin-1 was detected by real-time PCR and Western blotting after ATP treatment for 6 h and 12 h. (B) Real-time PCR and Western blotting were used to examine the mRNA and protein expression of Claudin-1 after UTP treatment. Three independent experiments were performed. \* $P < 0.05$  vs. control cells.
