# Supplementary material for: P2Y2 receptor promotes cell invasion and metastasis in prostate cancer cells
Source: PubMed Central journal article supplement — Br J Cancer. 2013 Aug 22;109(6):1666–75. doi: 10.1038/bjc.2013.484 (PMC3776994; doi:10.1038/bjc.2013.484), 2013-08-22
Supplement: bjc2013484x4.pdf [file bjc2013484x4.pdf]

## Supplementary Figure 4

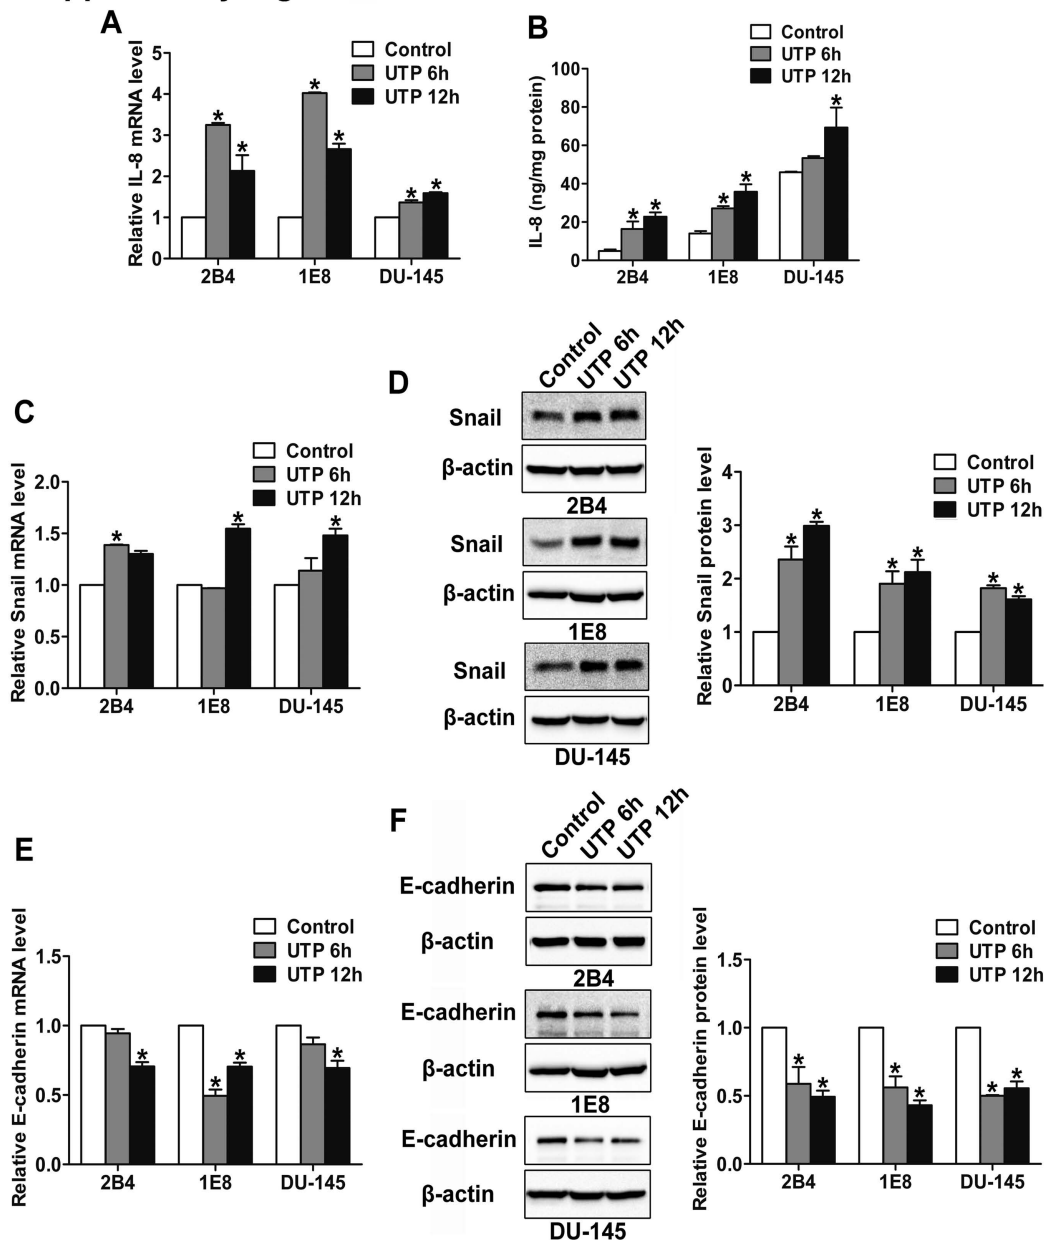

**Supplementary Figure 4.** The effects of extracellular UTP on expressions of IL-8, Snail and E-cadherin in prostate cancer cells. **(A)** Real-time PCR and **(B)** ELISA assay were used to evaluate the expression of IL-8 at mRNA and protein levels. Real-time PCR and Western blotting were used to examine the mRNA and protein expression of **(C and D)** Snail and **(E and F)** E-cadherin after UTP treatment, respectively. Three independent experiments were performed. \* $P < 0.05$  vs. control cells.
