# Supplementary material for: P2Y2 receptor promotes cell invasion and metastasis in prostate cancer cells
Source: PubMed Central journal article supplement — Br J Cancer. 2013 Aug 22;109(6):1666–75. doi: 10.1038/bjc.2013.484 (PMC3776994; doi:10.1038/bjc.2013.484), 2013-08-22
Supplement: bjc2013484x5.pdf [file bjc2013484x5.pdf]

## Supplementary Figure 5

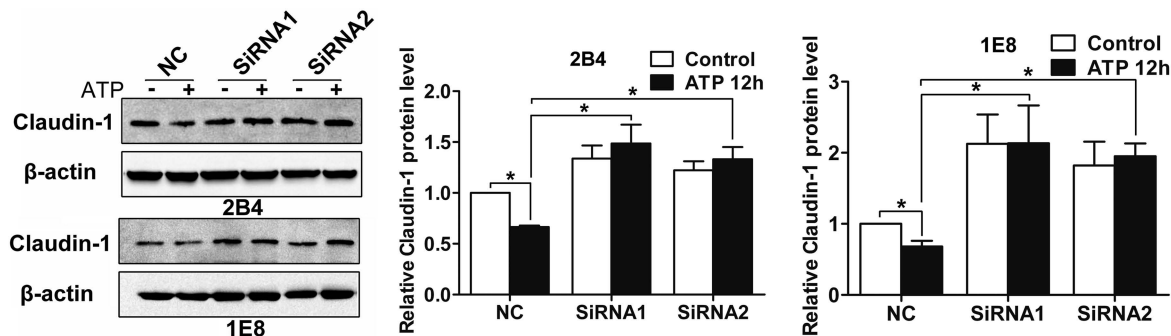

**Supplementary Figure 5.** After knockdown of P2Y2 receptor, cells were treated with 100  $\mu$ M ATP for 12 h. Western blotting was performed to detect the expression of Claudin-1. Three independent experiments were performed. \* $P < 0.05$ .
